# Supplementary material
Source: Elsevier journal article supplement (https://www.sciencedirect.com/science/article/pii/S0212656721001001)
Supplement: mmc1 [file S0212656721001001:mmc1.doc]

Tabla suplementaria 1. Objetivo de control glucémico individualizado. Recomendaciones redGDPS 2018.

| Edad | Duración de DM2, presencia de complicaciones o comorbilidades | HbA1c objetivo |
| --- | --- | --- |
| ≤ 65 años | Sin complicaciones o comorbilidades graves | <7,0% |
| > 15 años de evolución o con complicaciones o comorbilidades graves | <8,0% |
| 66-75 años | ≤ 15 años de evolución sin complicaciones o comorbilidades graves | <7,0% |
| > 15 años de evolución sin complicaciones o comorbilidades graves | 7,0-8,0% |
| Con complicaciones o comorbilidades graves | <8,5% |
| > 75 años | | <8,5% |
